# Supplementary material for: Sub-lethal concentrations of neonicotinoid insecticides at the field level affect negatively honey yield: Evidence from a 6-year survey of Greek apiaries
Source: PubMed Central journal article supplement (PMC6483167; doi:10.1371/journal.pone.0215363), 2019-04-25
Supplement: pone.0215363.s002.pdf [file pone.0215363.s002.pdf]

Table S1: Summary Statistics of the Variables

| Variable                                     | Mean  | Min   | Max    | Std.Dev. |
|----------------------------------------------|-------|-------|--------|----------|
| <i>Output and Inputs</i>                     |       |       |        |          |
| Honey Production (in kgs)                    | 3,160 | 802   | 8,508  | 1,671    |
| Veterinary Expenses (in Euros)               | 242   | 74    | 787    | 135      |
| Intermediate Inputs (in Euros)               | 1,867 | 488   | 10,761 | 1,680    |
| Family Labor (in hours)                      | 322   | 62    | 1,167  | 170      |
| Capital Stock (in Euros)                     | 3,076 | 333   | 14,507 | 2,639    |
| Number of Bees (in 000s)                     | 5,322 | 1,780 | 14,000 | 2,525    |
| <i>Bee Farm Characteristics</i>              |       |       |        |          |
| Mite Infestation (No of Mites)               | 5,507 | 1,872 | 13,051 | 1,864    |
| Winter Precipitation (in mm)                 | 422   | 216   | 1,072  | 147      |
| Relative Humidity (%)                        | 0.44  | 0.24  | 0.61   | 0.086    |
| Aridity Index                                | 0.79  | 0.35  | 1.49   | 0.33     |
| <i>Damaging Input</i>                        |       |       |        |          |
| Neonicotinoids (in $\mu\text{g}/\text{kg}$ ) | 1.386 | 0.377 | 2.842  | 0.614    |
