# Supplementary material for: Sub-lethal concentrations of neonicotinoid insecticides at the field level affect negatively honey yield: Evidence from a 6-year survey of Greek apiaries
Source: PubMed Central journal article supplement (PMC6483167; doi:10.1371/journal.pone.0215363), 2019-04-25
Supplement: pone.0215363.s003.pdf [file pone.0215363.s003.pdf]

Table S2: Parameter Estimates of the Translog Production Function

| Par.         | Est.    | St. Error | Par.          | Est.    | St. Error |
|--------------|---------|-----------|---------------|---------|-----------|
| $\beta_0$    | 0.8572  | 0.0262**  | $\beta_{VV}$  | 0.2970  | 0.1329**  |
| $\beta_B$    | 0.3059  | 0.0853**  | $\beta_{IL}$  | -0.1344 | 0.1053    |
| $\beta_I$    | 0.1661  | 0.0269**  | $\beta_{IC}$  | -0.0513 | 0.0693    |
| $\beta_L$    | 0.1701  | 0.0402**  | $\beta_{IV}$  | 0.2521  | 0.1374*   |
| $\beta_C$    | 0.1080  | 0.0252**  | $\beta_{LC}$  | 0.0112  | 0.1127    |
| $\beta_V$    | 0.1837  | 0.0416**  | $\beta_{LV}$  | -0.4706 | 0.2226**  |
| $\beta_T$    | 0.0698  | 0.0314**  | $\beta_{CV}$  | -0.3932 | 0.1208**  |
| $\beta_{TT}$ | 0.1309  | 0.0606**  | $\beta_{BI}$  | -0.4476 | 0.1644**  |
| $\beta_{BT}$ | 0.0066  | 0.0711    | $\beta_{BL}$  | 0.9004  | 0.1975**  |
| $\beta_{IT}$ | 0.0140  | 0.0321    | $\beta_{BC}$  | 0.3735  | 0.1135**  |
| $\beta_{LT}$ | -0.0336 | 0.0424    | $\beta_{BV}$  | 0.0977  | 0.2275    |
| $\beta_{CT}$ | 0.0158  | 0.0237    | $\alpha_Z$    | -0.4988 | 0.1512**  |
| $\beta_{VT}$ | 0.0143  | 0.0535    | $\alpha_{ZM}$ | -0.0875 | 0.0504*   |
| $\beta_{BB}$ | -0.6035 | 0.2434**  | $\alpha_{ZP}$ | 0.2468  | 0.0653**  |
| $\beta_{II}$ | -0.0261 | 0.0758    | $\alpha_{ZH}$ | -0.0262 | 0.0817    |
| $\beta_{LL}$ | 0.0372  | 0.0786    | $\alpha_{ZA}$ | 0.1402  | 0.0457**  |
| $\beta_{CC}$ | 0.0426  | 0.0315    | $\bar{R}^2$   | 0.8848  |           |

$B$  refers to bee density,  $I$  to intermediate inputs,  $L$  to family labor,  $C$  to capital,  $V$  to veterinary expenses,  $T$  to time,  $Z$  to insecticides,  $M$  to mite infestation,  $P$  to winter precipitation,  $H$  to relative humidity, and  $A$  to aridity index,. Robust standard errors are reported in the table. \* and \*\* indicate statistical significance at the 10 and 5 per cent level, respectively.
